# Supplementary material for: Design of meso-TiO2@MnOx–CeOx/CNTs with a core–shell structure as DeNOx catalysts: promotion of activity, stability and SO2-tolerance
Source: Royal Society of Chemistry journal article supplement (doi:10.1039/c3nr03150k), 2013-01-01
Supplement: c3nr03150k.pdf [file c3nr03150k.pdf]

*Electronic Supplementary Information (ESI)*

**Design of meso-TiO<sub>2</sub>@MnO<sub>x</sub>-CeO<sub>x</sub>/CNTs with a Core-Shell Structure as DeNO<sub>x</sub> Catalysts: Promotion of Activity, Stability and SO<sub>2</sub>-tolerance**

**Lei Zhang,<sup>a</sup> Dongsong Zhang,<sup>a\*</sup> Jianping Zhang,<sup>a</sup> Sixiang Cai,<sup>ab</sup> Cheng Fang,<sup>ab</sup> Lei Huang,<sup>a</sup> Hongrui Li,<sup>a</sup> Ruihua Gao<sup>a</sup> and Liyi Shi<sup>ab</sup>**

<sup>a</sup> *Research Center of Nano Science and Technology, Shanghai University, Shanghai 200444, China.*

*Fax: +86-21-66136079; Tel: +86-21-66136081; E-mail: dszhang@shu.edu.cn*

<sup>b</sup> *School of Material Science and Engineering, Shanghai University, Shanghai 200072, China*

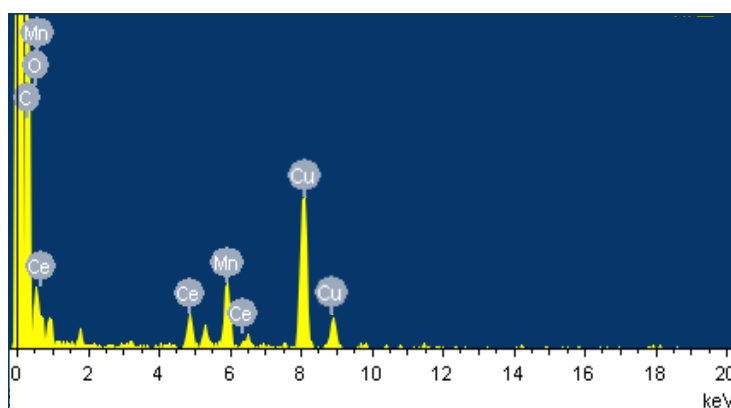

**Fig. S1** EDX spectrum of MnCe/CNTs.

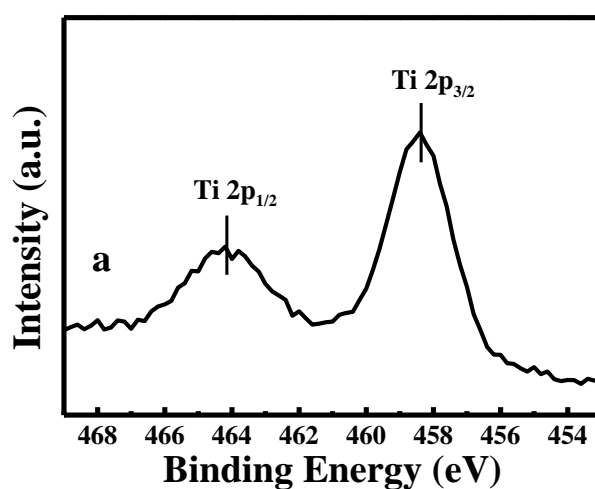

**Fig. S2** XPS spectrum of Ti 2p of meso-TiO<sub>2</sub>@MnCe/CNTs.

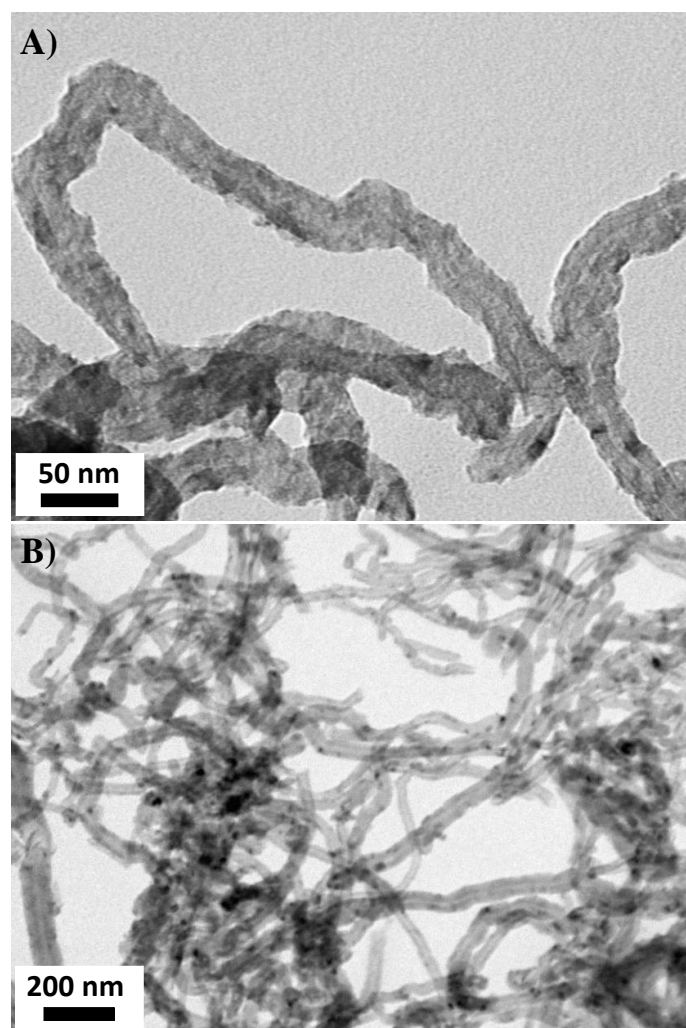

**Fig. S3** TEM images of the catalysts after the stability test at 300 °C: (A) meso-TiO<sub>2</sub>@MnCe/CNTs and (B) MnCe/CNTs.
